# Supplementary material for: A gold(iii)–TADF emitter as a sensitizer for high-color-purity and efficient deep-blue solution-processed OLEDs
Source: Royal Society of Chemistry journal article supplement (doi:10.1039/d1tc05487b), 2022-01-01
Supplement: d1tc05487b1.pdf [file d1tc05487b1.pdf]

## Electronic Supplementary Information

# **Gold(III)-TADF Emitter as Sensitizer for High-Color-Purity and Efficient Deep-Blue Solution-Processed OLEDs**

Dongling Zhou,<sup>a</sup> Siping Wu,<sup>a</sup> Gang Cheng<sup>\*a,b,c</sup> and Chi-Ming Che<sup>\*a,b,c</sup>

<sup>a</sup> State Key Laboratory of Synthetic Chemistry, Department of Chemistry, The University of Hong Kong, Pokfulam Road, Hong Kong SAR, China. E-mail: [ggcheng@hku.hk](mailto:ggcheng@hku.hk); [cmche@hku.hk](mailto:cmche@hku.hk)

<sup>b</sup> Hong Kong Quantum AI Lab Limited, 17 Science Park West Avenue, Pak Shek Kok, Hong Kong SAR

<sup>c</sup> HKU Shenzhen Institute of Research and Innovation, Shenzhen, Guangdong, 518053, China.

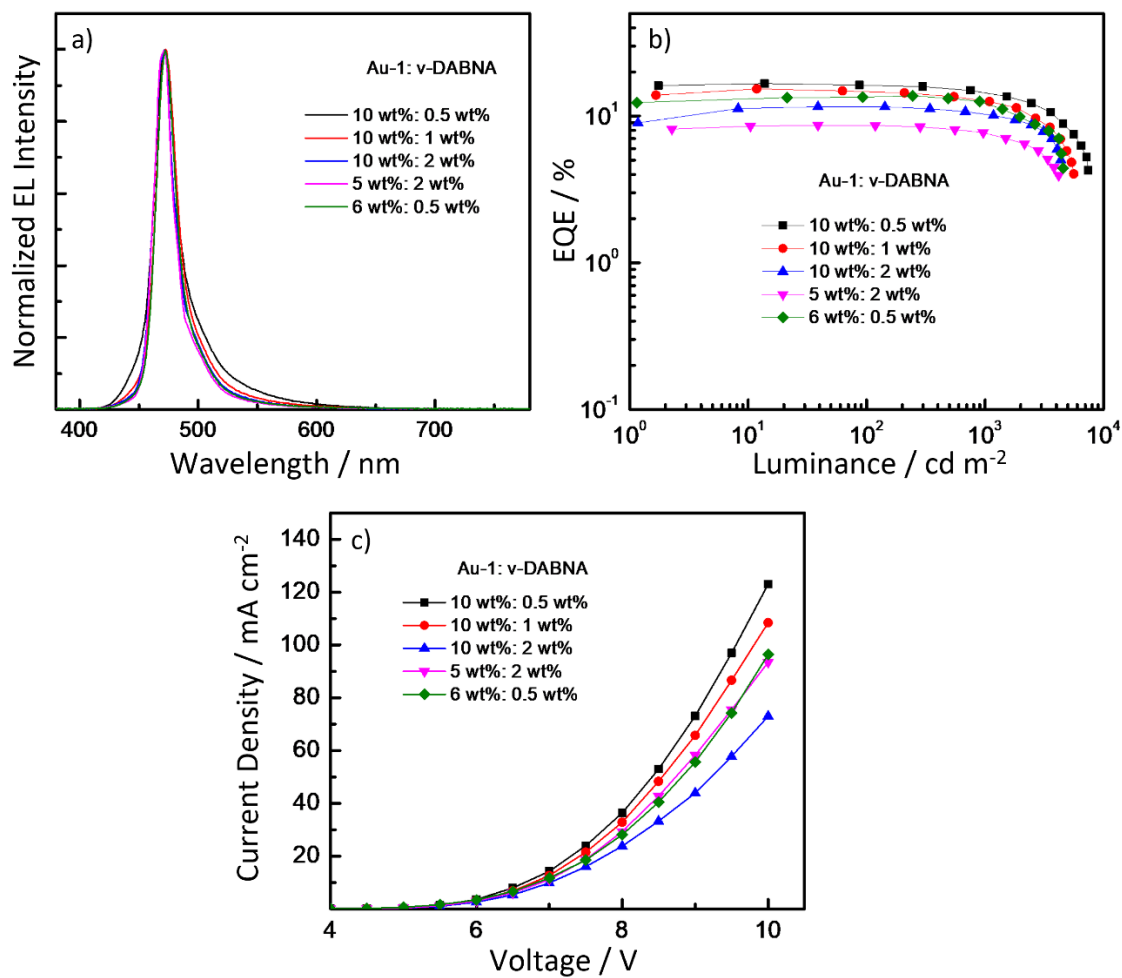

**Figure S1.** a) Normalized EL spectra, b) EQE-luminance, and c) current density-voltage characteristics of the sensitized SP-OLEDs with various concentrations of **Au-1** and v-DABNA.

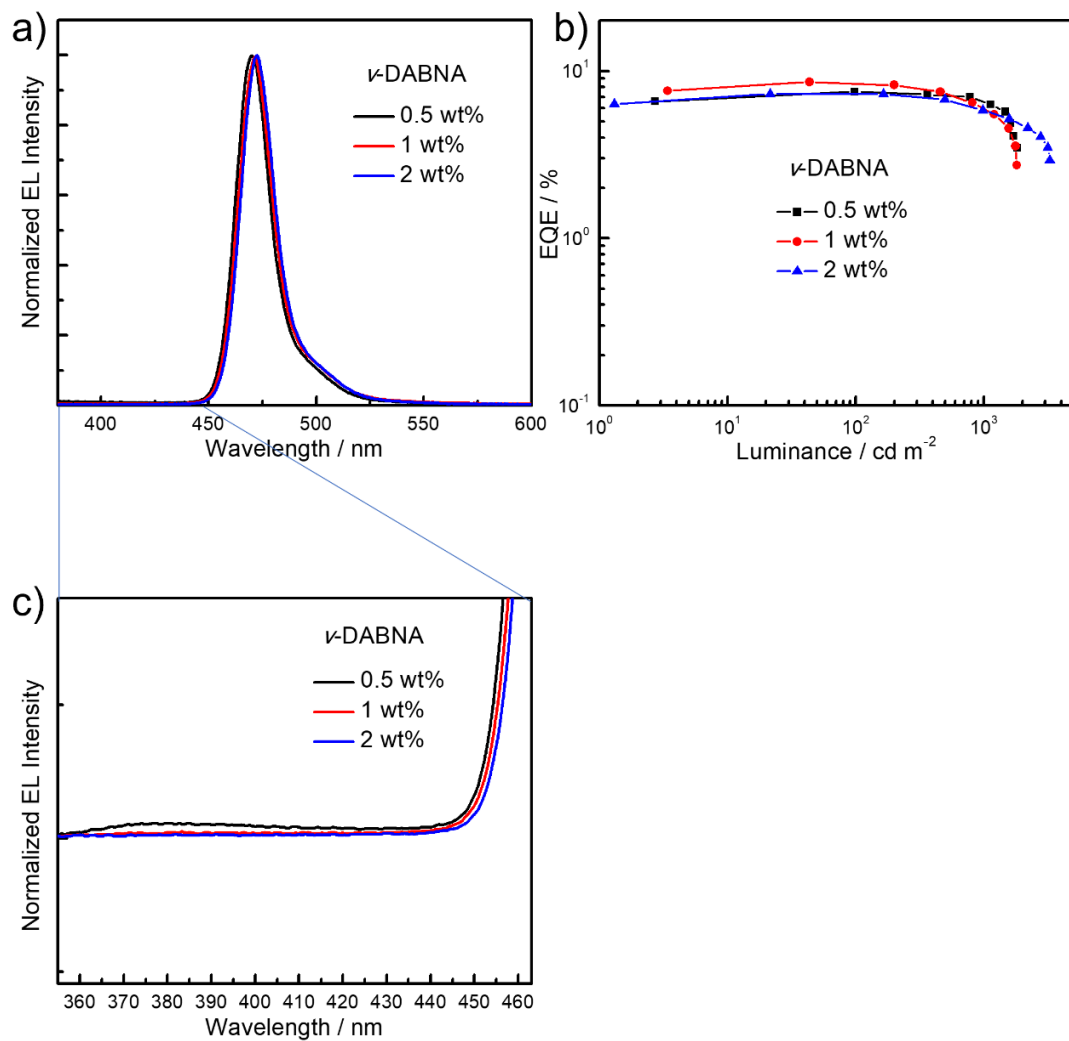

**Figure S2.** a) Normalized EL spectra and b) EQE-luminance characteristics of SP-OLEDs based on  $\nu$ -DABNA with different doping concentration ranging from 0.5 to 2 wt%. c) Enlarged spectrum of a) between wavelength from 355 to 465 nm.

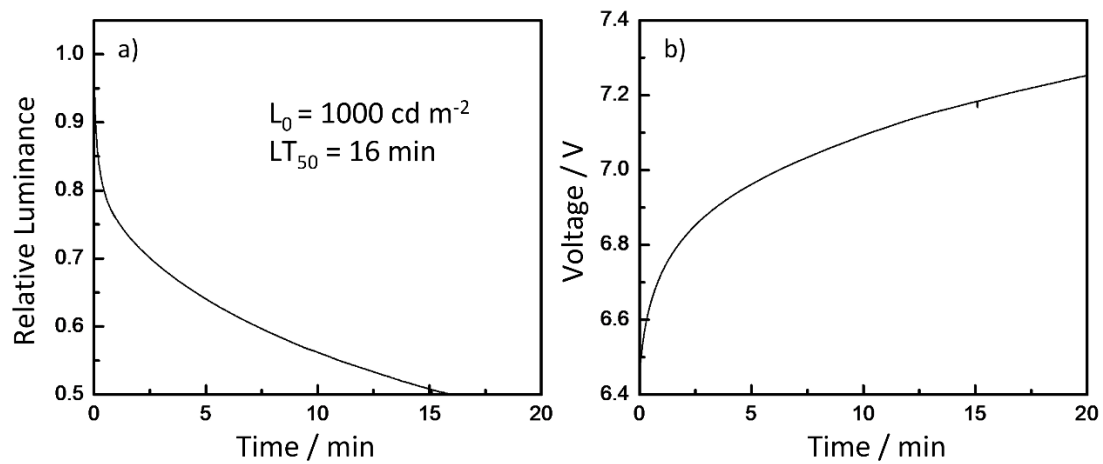

**Figure S3.** The dependence of a) relative luminance and b) driving voltage of the device with 10 wt% Au-1 and 0.5 wt% *v*-DABNA upon operation time at the initial luminance of  $1000 \text{ cd m}^{-2}$ .

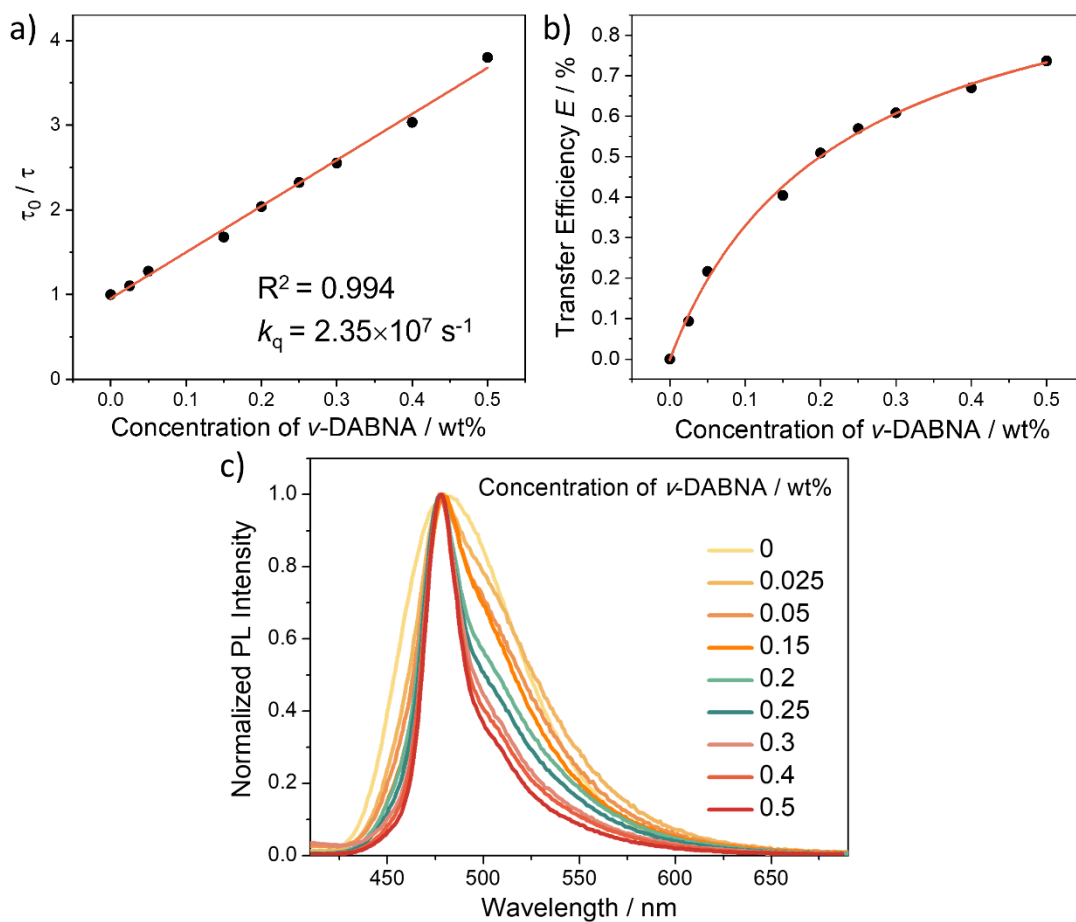

**Figure S4.** a) Stern-Volmer plot of the sensitized system PYD2:**Au-1**(10 wt%): $\nu$ -DABNA (0–0.5 wt%). The emission lifetimes were measured at 450 nm. The straight line is a linear fit to the data. b) the plot of transfer efficiency versus the concentration of  $\nu$ -DABNA. c) normalized emission spectra of **Au-1** (10 wt%) doped in PYD2 and the sensitized systems with different concentration of  $\nu$ -DABNA.

**Table S1.** Photophysical properties and corresponding energy transfer parameters of **Au-1**.

| sensitizer  | $\lambda_{em}$ [nm] | $\Phi_{PL}$ [%] | $\tau$ [ $\mu$ s] | $k_r$ [ $s^{-1}$ ] | HOMO/LUMO [eV] | $R_0/R_{hg}$ [nm] | $k_{ET}$ [ $s^{-1}$ ] | $\Phi_{ET}$ [%] |
|-------------|---------------------|-----------------|-------------------|--------------------|----------------|-------------------|-----------------------|-----------------|
| <b>Au-1</b> | 480                 | 28              | 0.52              | $5.38 \times 10^5$ | -5.16/-2.67    | 2.81/1.92         | $1.89 \times 10^7$    | 91              |

[a] The PL data of **Au-1** were recorded in PYD2 thin films (10 wt%); HOMO and LUMO energy levels were estimated according to the CV data measured in DMF.

**Table S2.** Key performances of SP-OLEDs studied in this work.

| Concentration of <b>Au-1</b> : v-DABNA | $L_{max}^a$<br>( $cd\ m^{-2}$ ) | $CE_{max}^b$<br>( $cd\ A^{-2}$ ) | $PE_{max}^c$<br>( $lm\ W^{-1}$ ) | $EQE_{max}^d$<br>(%) | $EQE_{1000}^e$<br>(%) | Roll-offs <sup>f</sup><br>(%) | CIE <sup>g</sup><br>(x, y) | $\lambda_{max}$<br>(nm) | FWHM <sup>h</sup><br>(nm) |
|----------------------------------------|---------------------------------|----------------------------------|----------------------------------|----------------------|-----------------------|-------------------------------|----------------------------|-------------------------|---------------------------|
| 0: 0.5 wt%                             | 1900                            | 6.31                             | 4.41                             | 7.51                 | 6.41                  | 14.6                          | 0.12, 0.11                 | 470                     | 18                        |
| 0: 1 wt%                               | 1900                            | 8.07                             | 5.67                             | 8.60                 | 5.96                  | 30.7                          | 0.12, 0.12                 | 471                     | 18                        |
| 0: 2 wt%                               | 3300                            | 7.09                             | 4.94                             | 7.30                 | 5.83                  | 20.1                          | 0.12, 0.13                 | 472                     | 18                        |
| 10 wt%: 0                              | 7800                            | 23.9                             | 18.7                             | 12.9                 | 8.98                  | 30.4                          | 0.16, 0.25                 | 473                     | 68                        |
| 10 wt%: 0.5 wt%                        | 7430                            | 22.5                             | 17.9                             | 16.6                 | 14.4                  | 13.3                          | 0.14, 0.18                 | 472                     | 23                        |
| 10 wt%: 1 wt%                          | 5620                            | 19.7                             | 14.0                             | 15.3                 | 12.7                  | 17.0                          | 0.13, 0.17                 | 472                     | 22                        |
| 10 wt%: 2 wt%                          | 4370                            | 13.8                             | 9.35                             | 11.6                 | 10.2                  | 12.1                          | 0.12, 0.17                 | 474                     | 21                        |
| 5 wt%: 2 wt%                           | 4200                            | 9.82                             | 7.27                             | 8.64                 | 7.66                  | 11.3                          | 0.12, 0.17                 | 475                     | 20                        |
| 6 wt%: 0.5 wt%                         | 4560                            | 14.8                             | 10.4                             | 13.7                 | 12.1                  | 11.7                          | 0.12, 0.17                 | 472                     | 20                        |

<sup>a</sup> Maximum luminance; <sup>b</sup> maximum current efficiency; <sup>c</sup> maximum power efficiency; <sup>d</sup> maximum external quantum efficiency; <sup>e</sup> external quantum efficiency at 1000  $cd\ m^{-2}$ ; <sup>f</sup> efficiency roll-offs were calculated based on the formula of  $\frac{EQE_{max}-EQE_{1000}}{EQE_{max}} \times 100$ ; <sup>g</sup> CIE coordinates at 1000  $cd\ m^{-2}$ ; <sup>h</sup> full width at half maximum.

**Table S3.** Key performances of recently reported blue-emitting SP-OLEDs.

| Emitter type | $EQE_{max}^a$<br>(%) | $EQE_{1000}^a$<br>(%) | CIE <sup>b</sup><br>(x, y) | FWHM <sup>c</sup><br>(nm) | $\lambda_{max}$<br>(nm) | Reference |
|--------------|----------------------|-----------------------|----------------------------|---------------------------|-------------------------|-----------|
| Hot-exciton  | 7.06                 | N/A                   | 0.15, 0.09                 | 52                        | 452                     | 5         |
| TADF-polymer | 18.8                 | 16.1                  | 0.20, 0.31                 | N/A                       | 469                     | 6         |
| TADF         | 10.7                 | 7.25 <sup>d</sup>     | 0.21, 0.41                 | N/A                       | 496                     | 7         |
| TADF         | 15.25                | 9.98                  | 0.16, 0.25                 | 68                        | 473                     | 8         |
| TADF         | 9.90                 | 1 <sup>e</sup>        | 0.17, 0.07                 | 42                        | 424                     | 9         |
| TADF         | 21.6                 | 19.6                  | 0.16, 0.30                 | 76                        | 478                     | 10        |
| Fluorescence | 4.10                 | N/A                   | 0.15, 0.09                 | 62                        | 440                     | 11        |
| TADF         | 15.8                 | 12.0 <sup>d</sup>     | 0.16, 0.05                 | 42                        | 428                     | 12        |
| TADF         | 23.23                | 6 <sup>e</sup>        | 0.19, 0.36                 | N/A                       | 492                     | 13        |
| TADF         | 10.1                 | 2 <sup>e</sup>        | 0.16, 0.08                 | 61                        | 424                     | 14        |
| TADF         | 1.08                 | N/A                   | 0.19, 0.19                 | 32                        | 464                     | 15        |
| TADF         | 11.0                 | 7.4                   | 0.15, 0.24                 | 67                        | 474                     | 16        |
| TASF         | 16.6                 | 14.2                  | 0.14, 0.18                 | 23                        | 472                     | This work |

<sup>a</sup> External quantum efficiency; <sup>b</sup> CIE coordinates; <sup>c</sup> full width at half maximum; <sup>d</sup> at 500  $cd\ m^{-2}$ ; <sup>e</sup> estimated from the corresponding figures.
